# Supplementary material
Source: publisher figshare collection journal article supplement (https://wiley.figshare.com/articles/dataset/_/3556818)
Supplement: Supplementary file 1 [file 1 › appendix-D.htm]

Ecological Archives E094-132-A4


*Ecological Archives* E094-132-A4

Brett T. McClintock, Paul B. Conn, Robert S. Alonso, Kevin R. Crooks. 2013. Integrated modeling of bilateral photo-identification data in mark–recapture analyses. *Ecology* 94:1464–1471. http://dx.doi.org/10.1890/12-1613.1

Appendix D. Extension for partially observed 'B' encounters.

> View / download PDF.


---

[Back to E094-132]
